# Supplementary material for: Learning steers the ontogeny of an efficient hunting sequence in zebrafish larvae
Source: eLife journal article supplement (doi:10.7554/elife.55119), 2020-08-10
Supplement: supp [file elife-55119-supp-v1.zip]

**A**

Density function

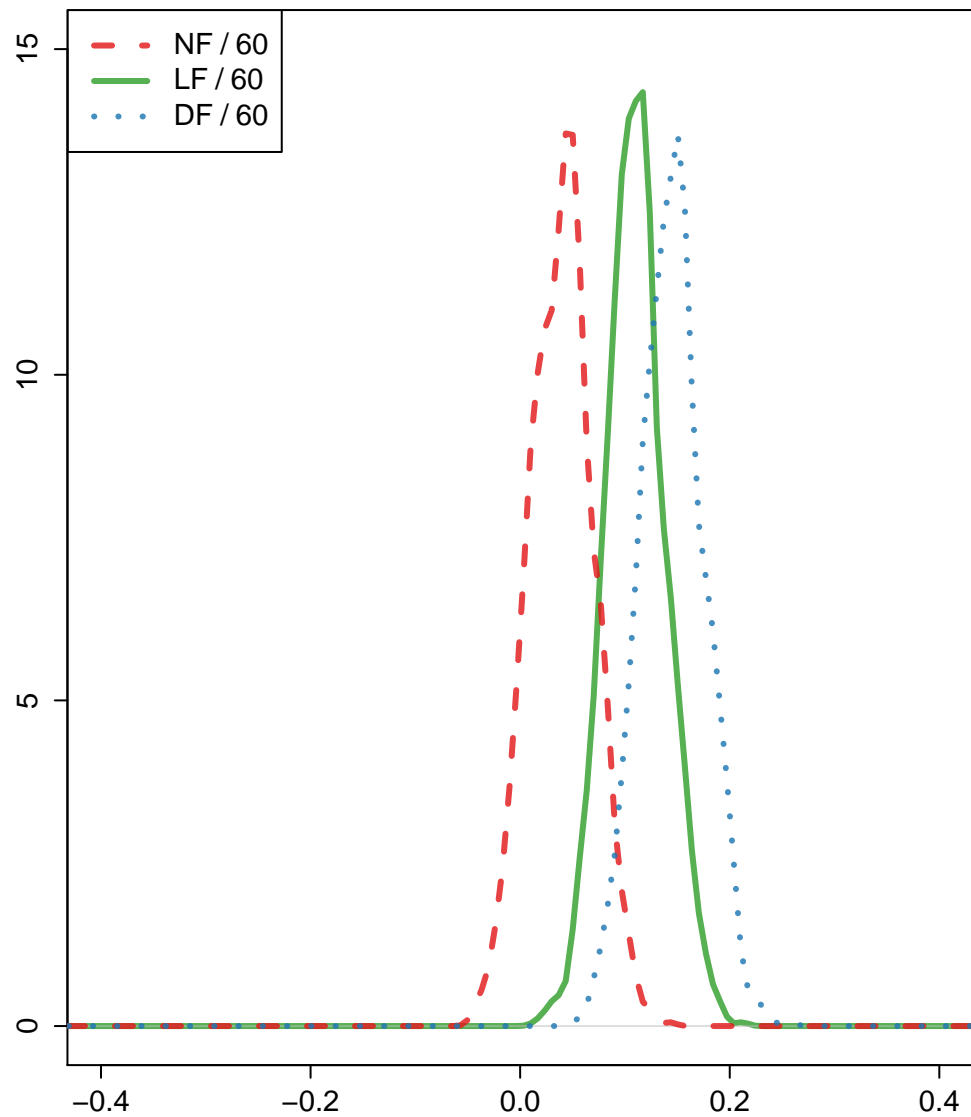

Group correlation of capture-speed and distance

**B**

Cumulative function

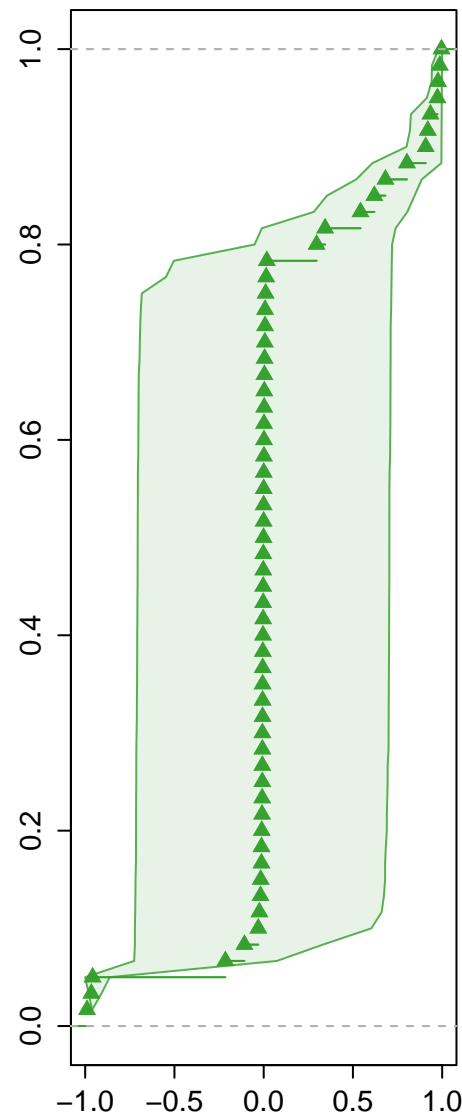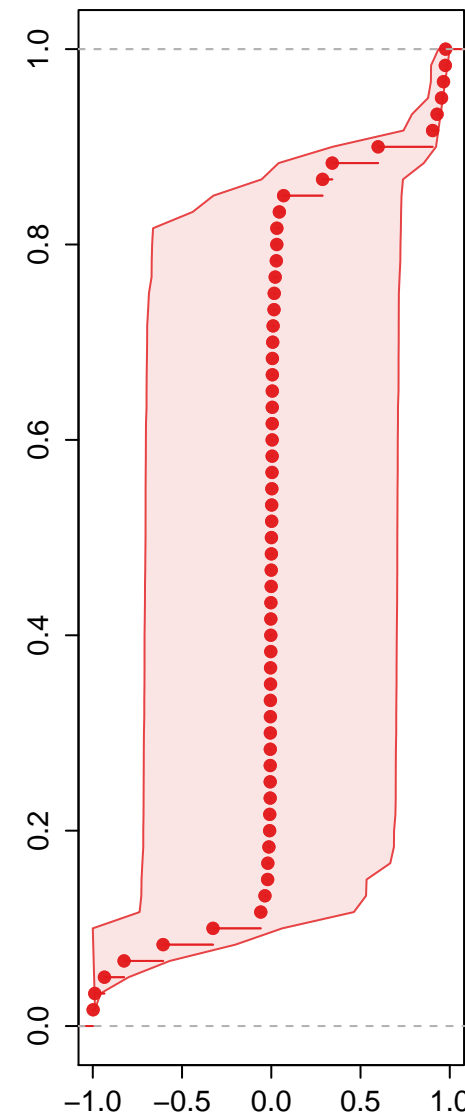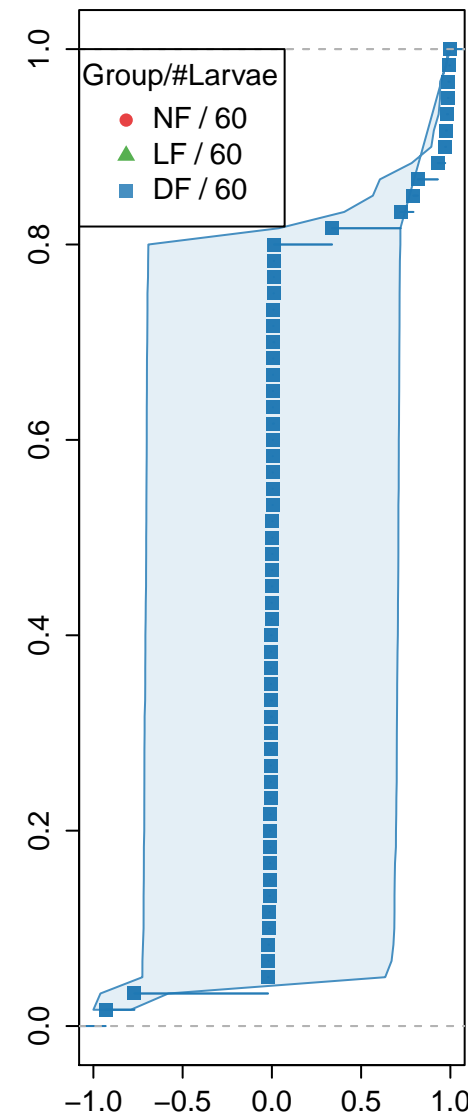

Correlation of capture-speed and distance per larva
