# Supplementary figures and images for: Learning steers the ontogeny of an efficient hunting sequence in zebrafish larvae
Source: eLife journal article supplement (doi:10.7554/elife.55119), 2020-08-10

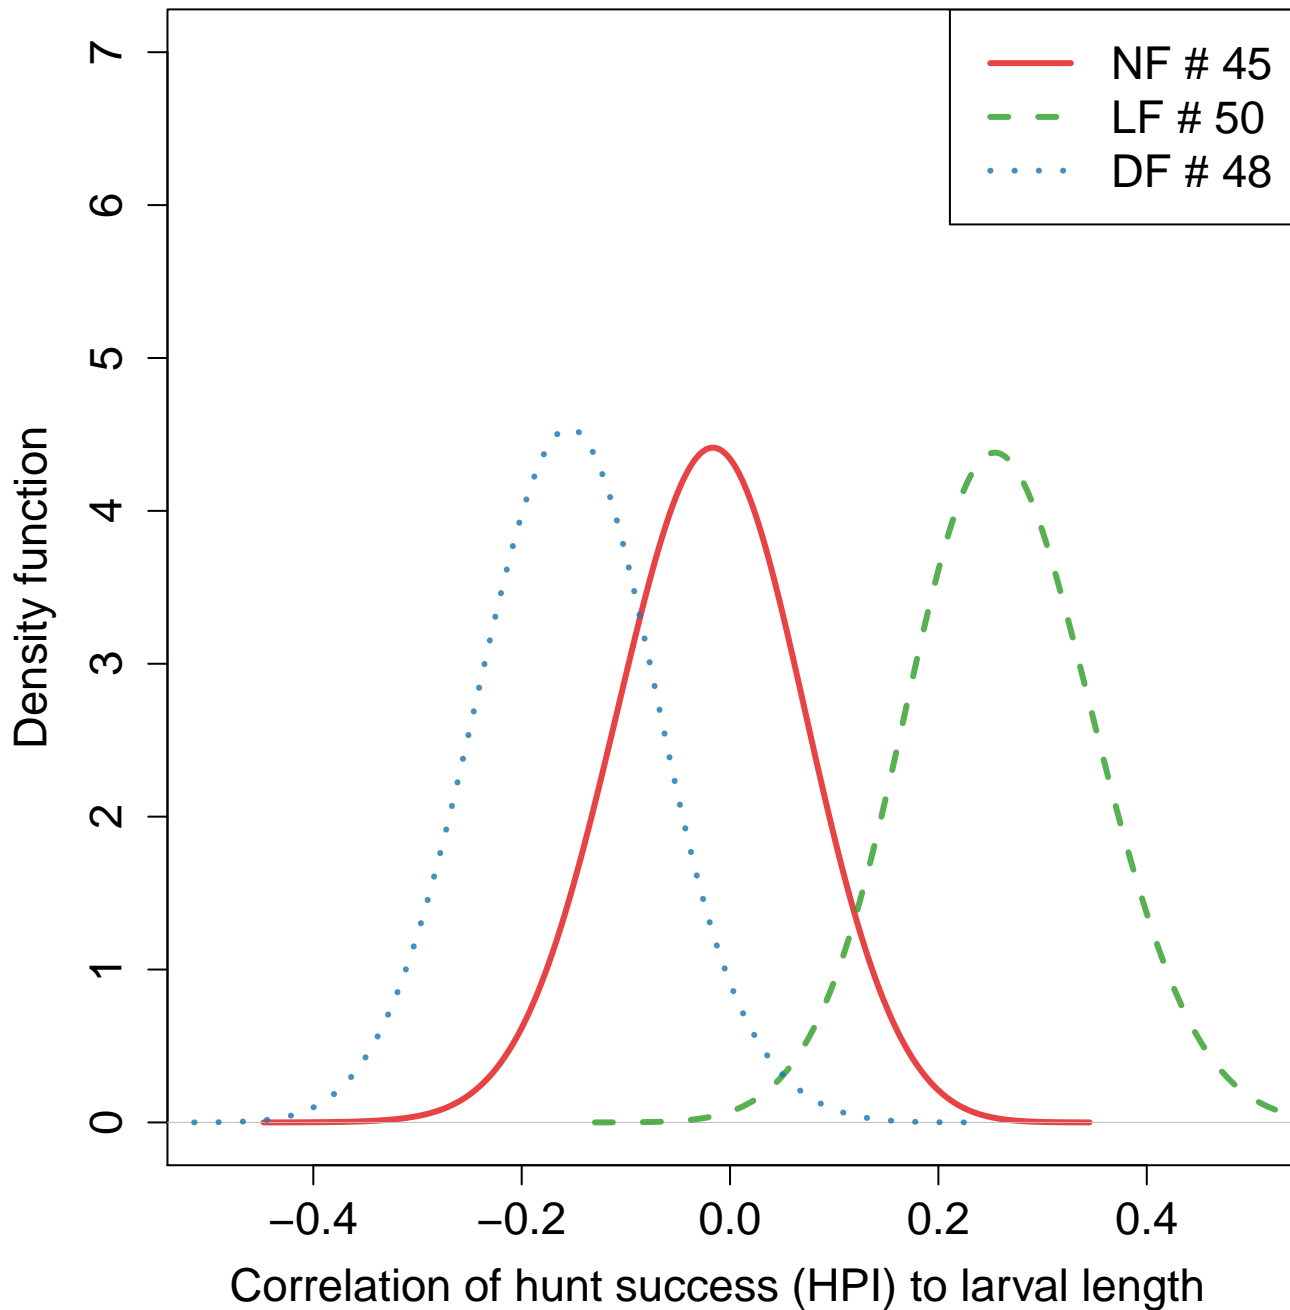

Supplement: supp [file elife-55119-supp-v1.zip]

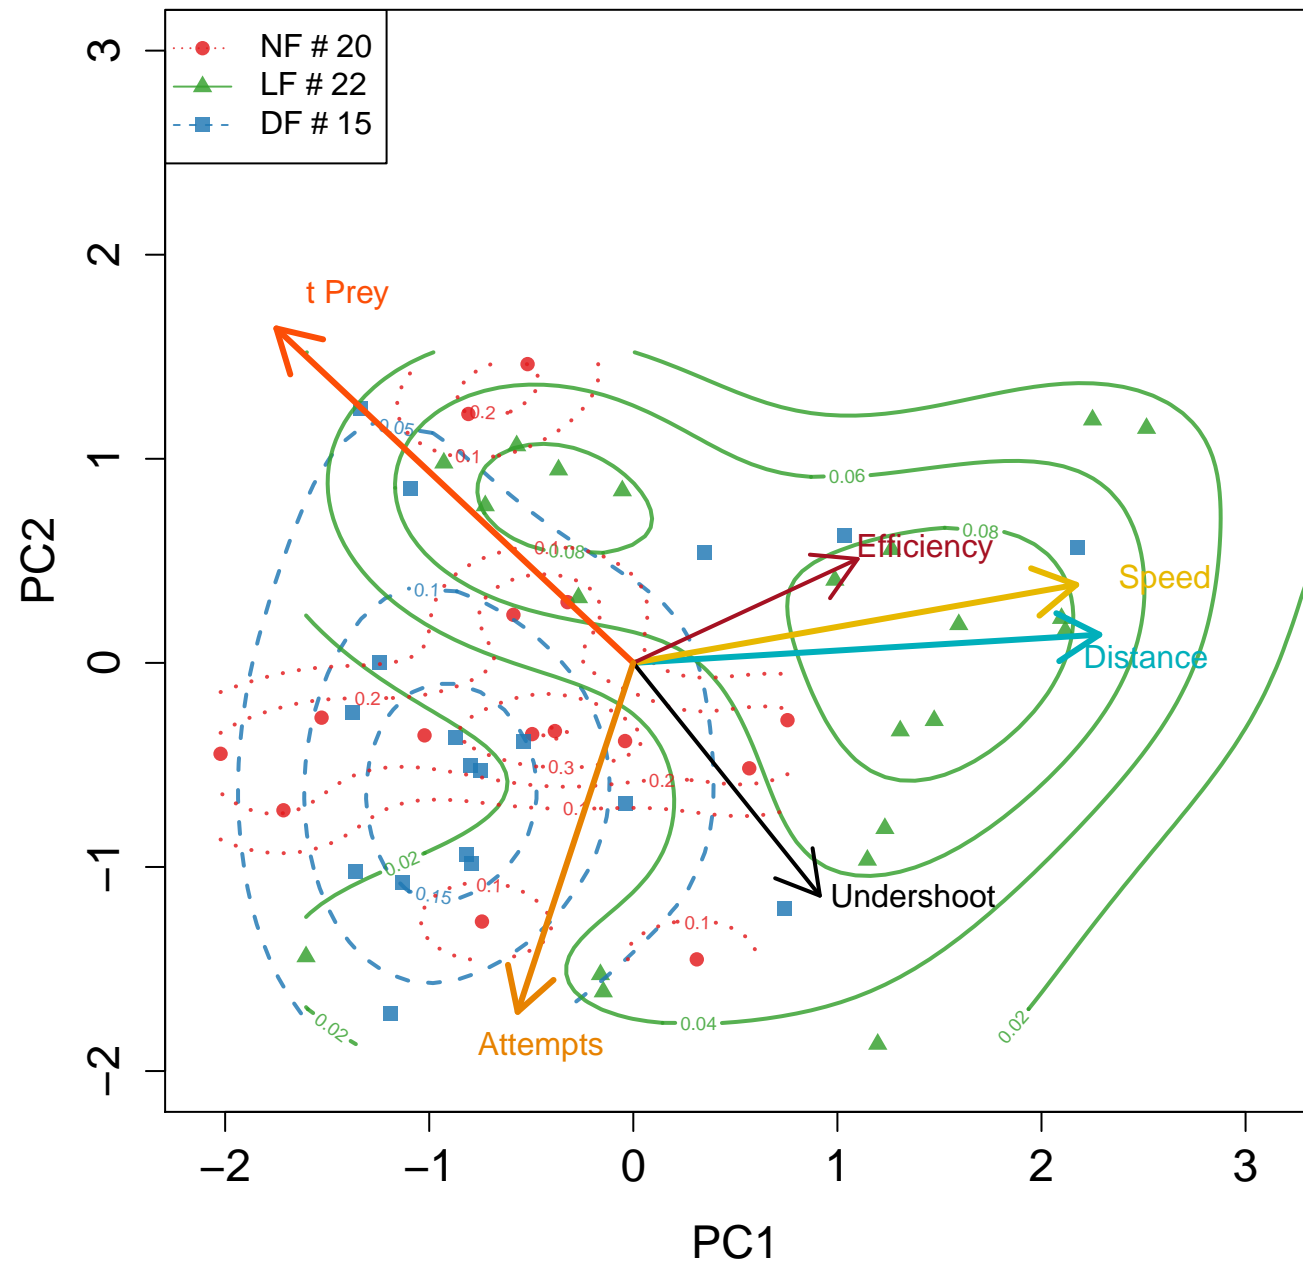

Supplement: supp [file elife-55119-supp-v1.zip]

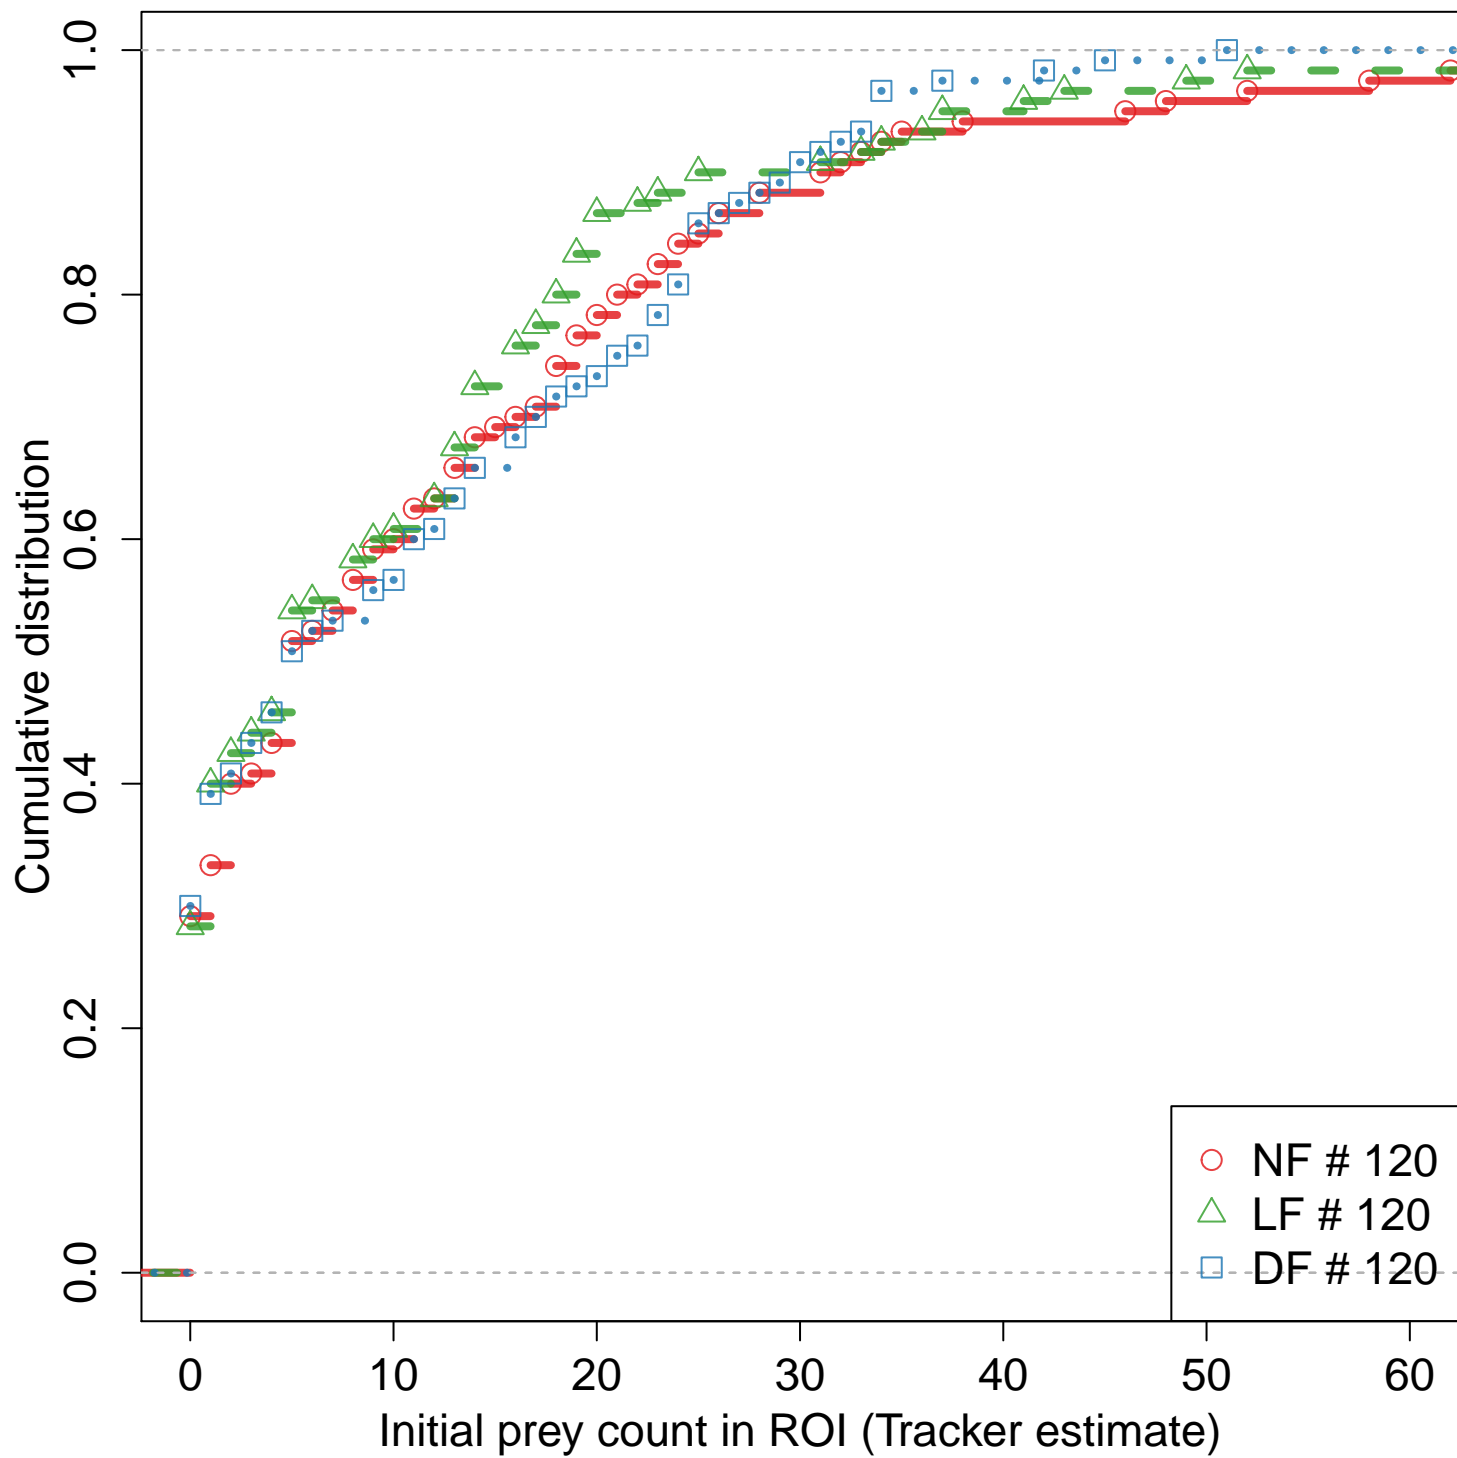

Supplement: supp [file elife-55119-supp-v1.zip]

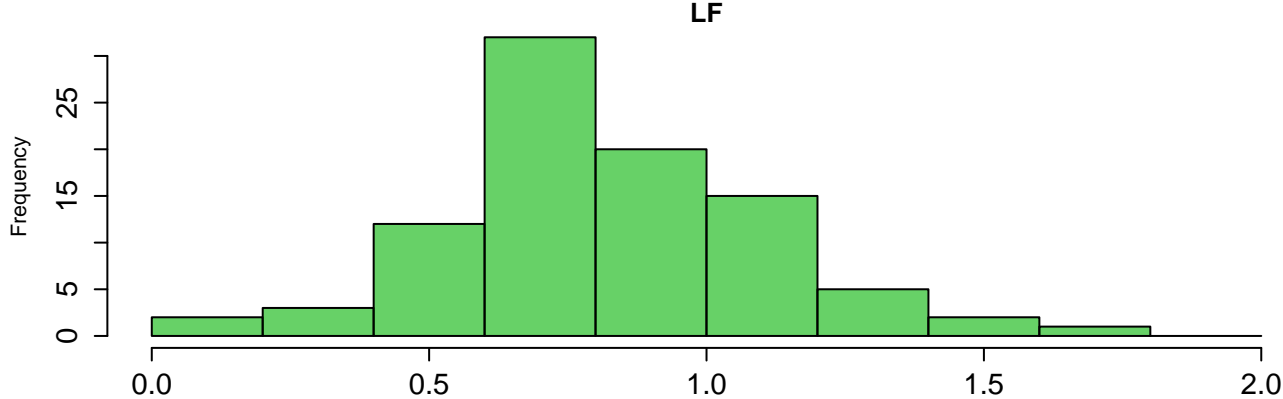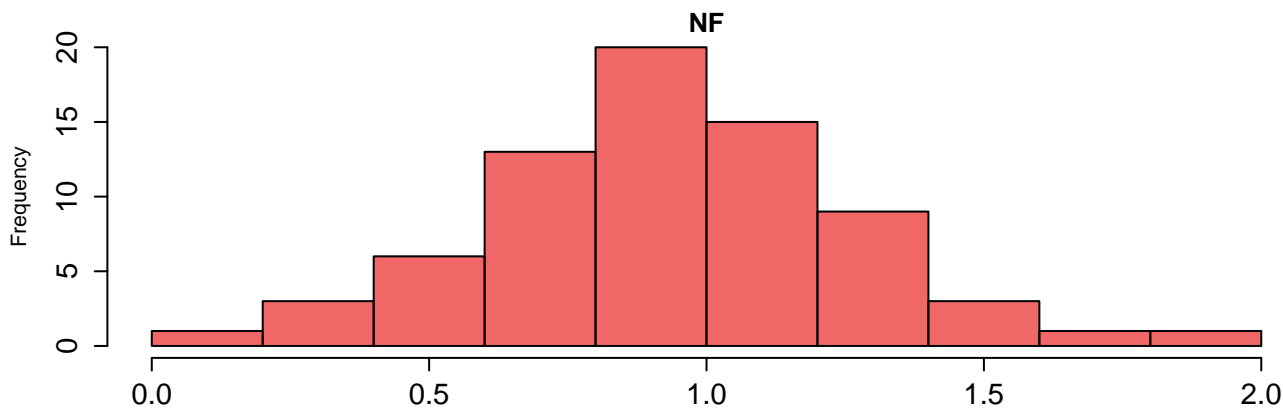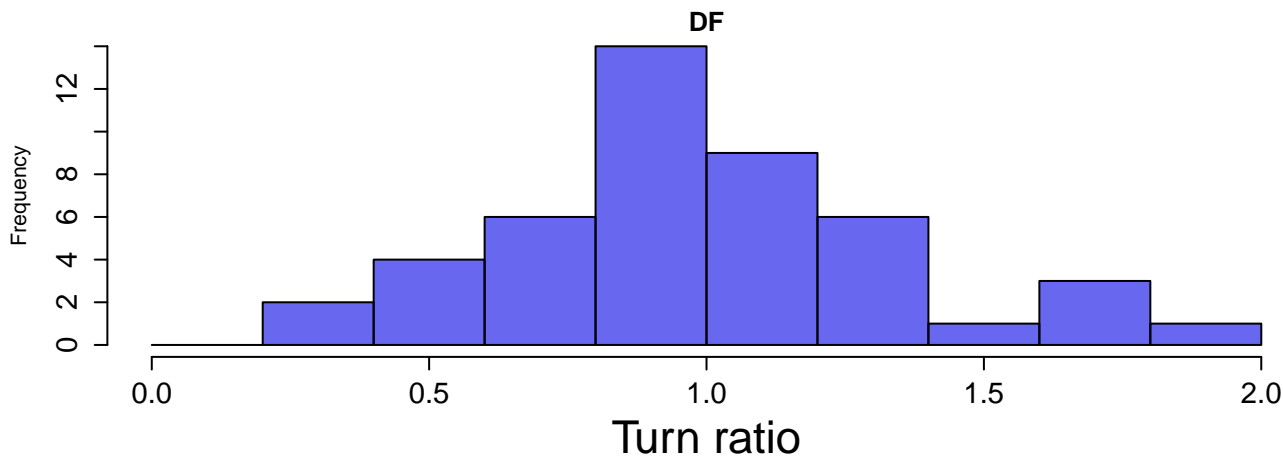

Supplement: supp [file elife-55119-supp-v1.zip]

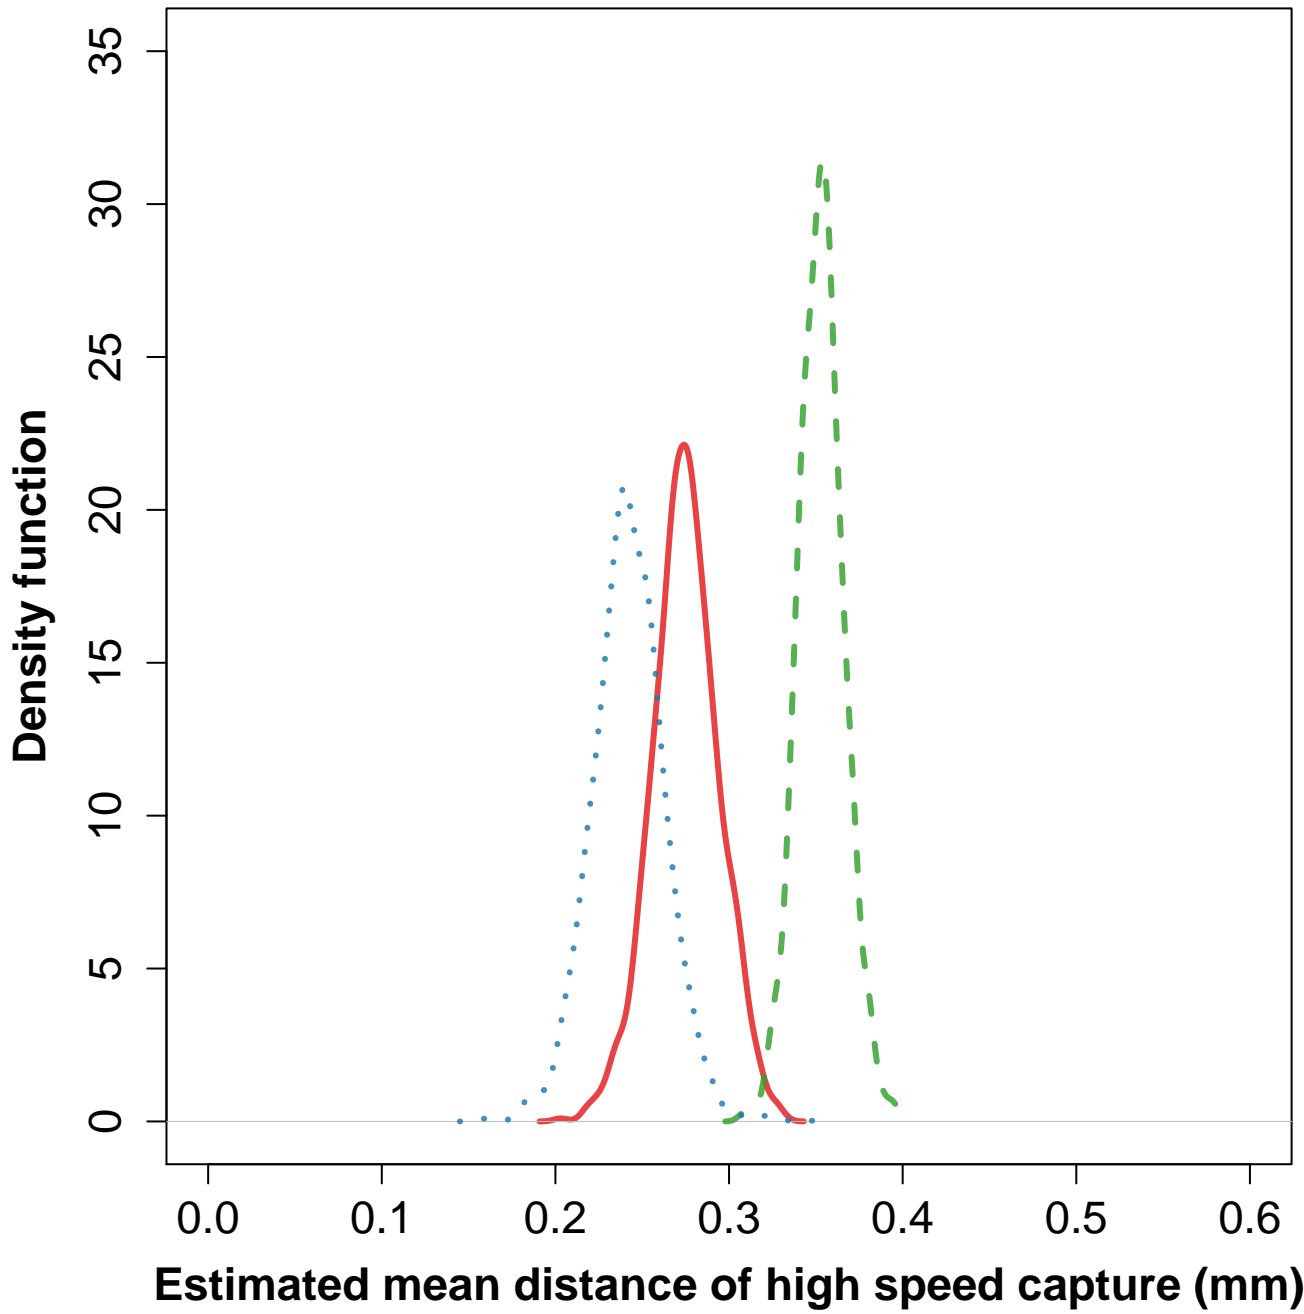

Supplement: supp [file elife-55119-supp-v1.zip]

Density function

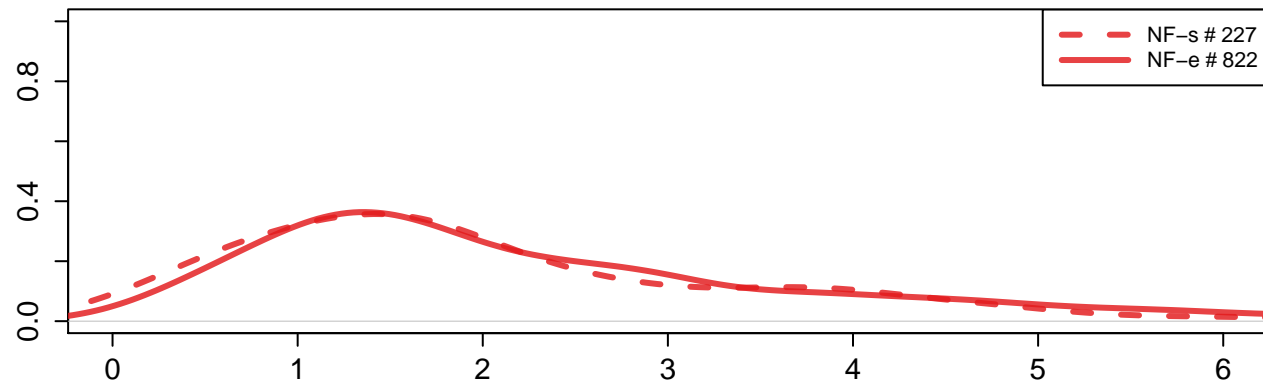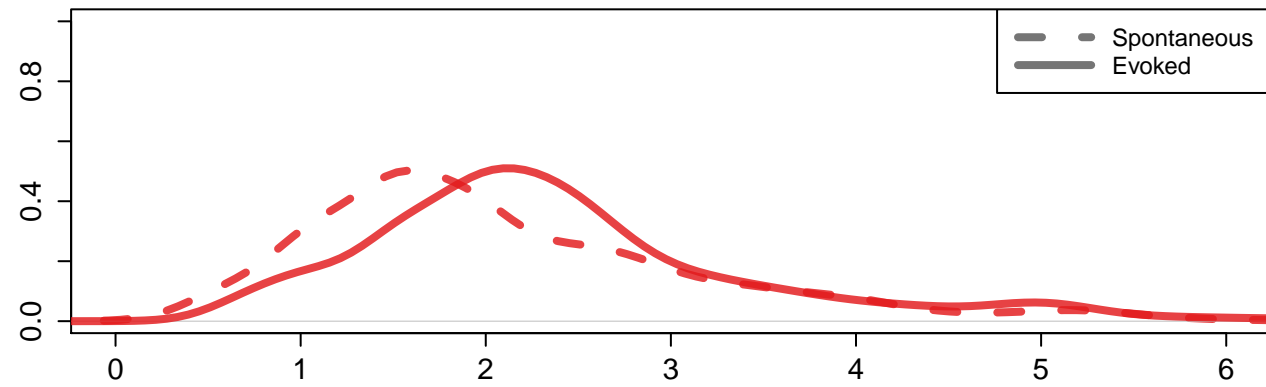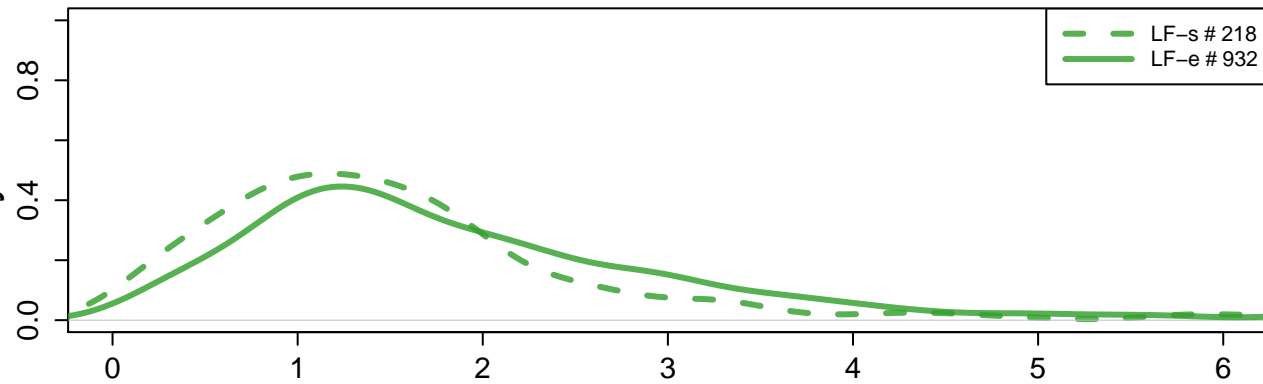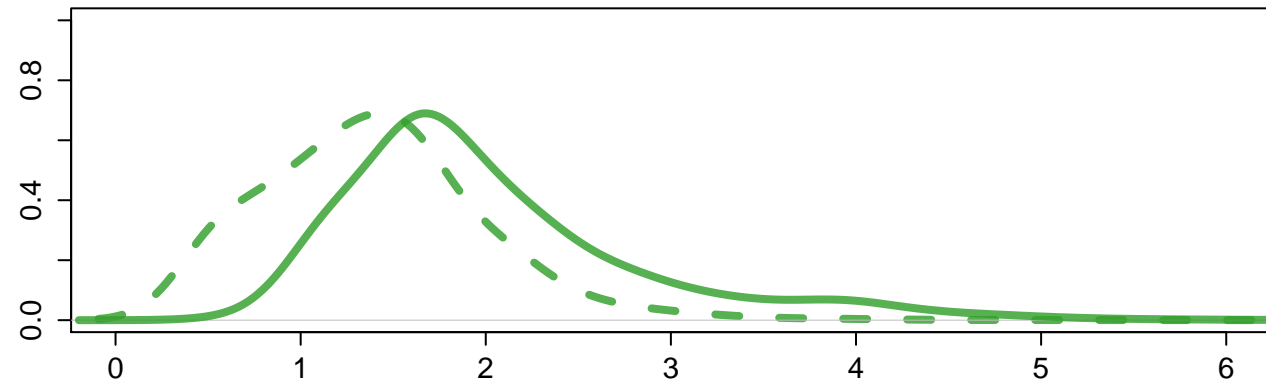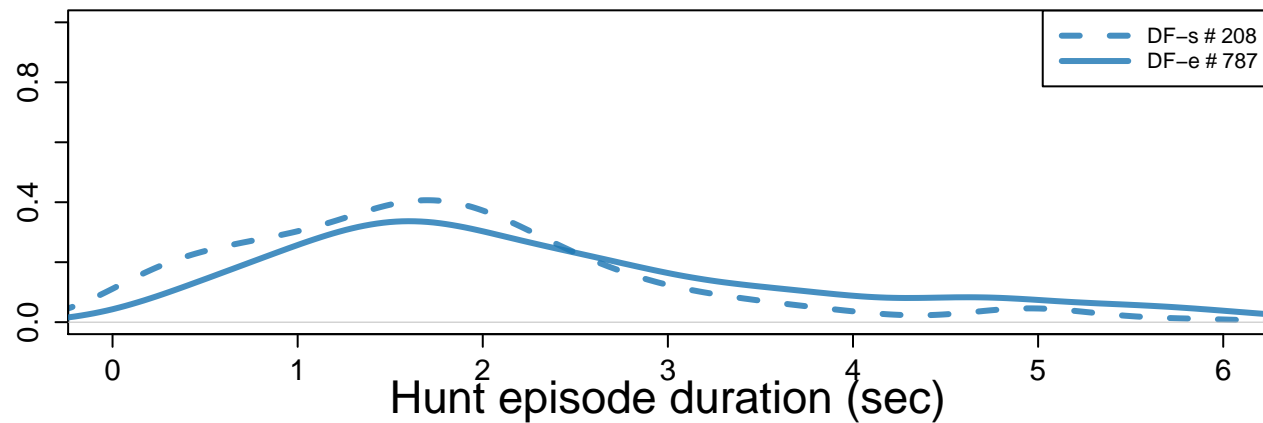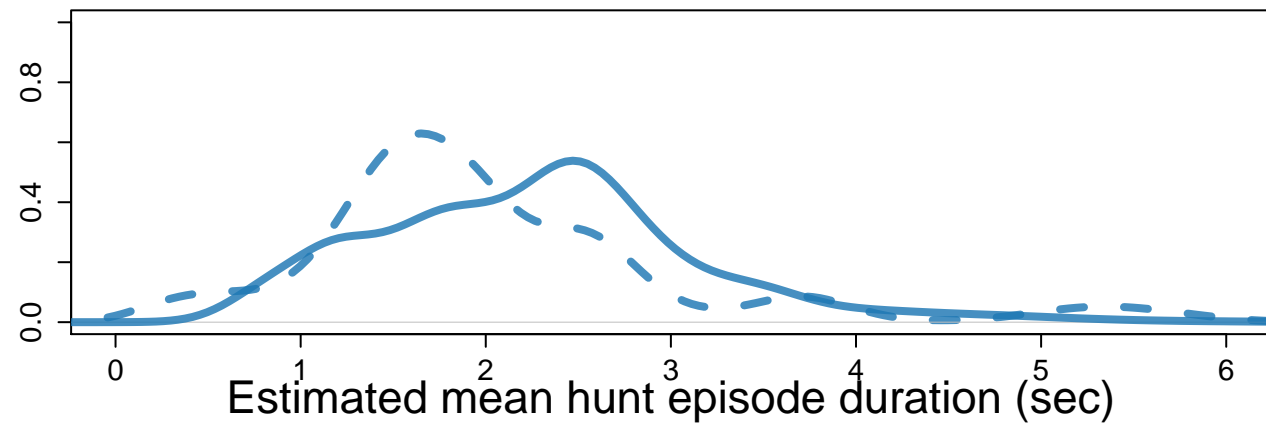

Supplement: supp [file elife-55119-supp-v1.zip]

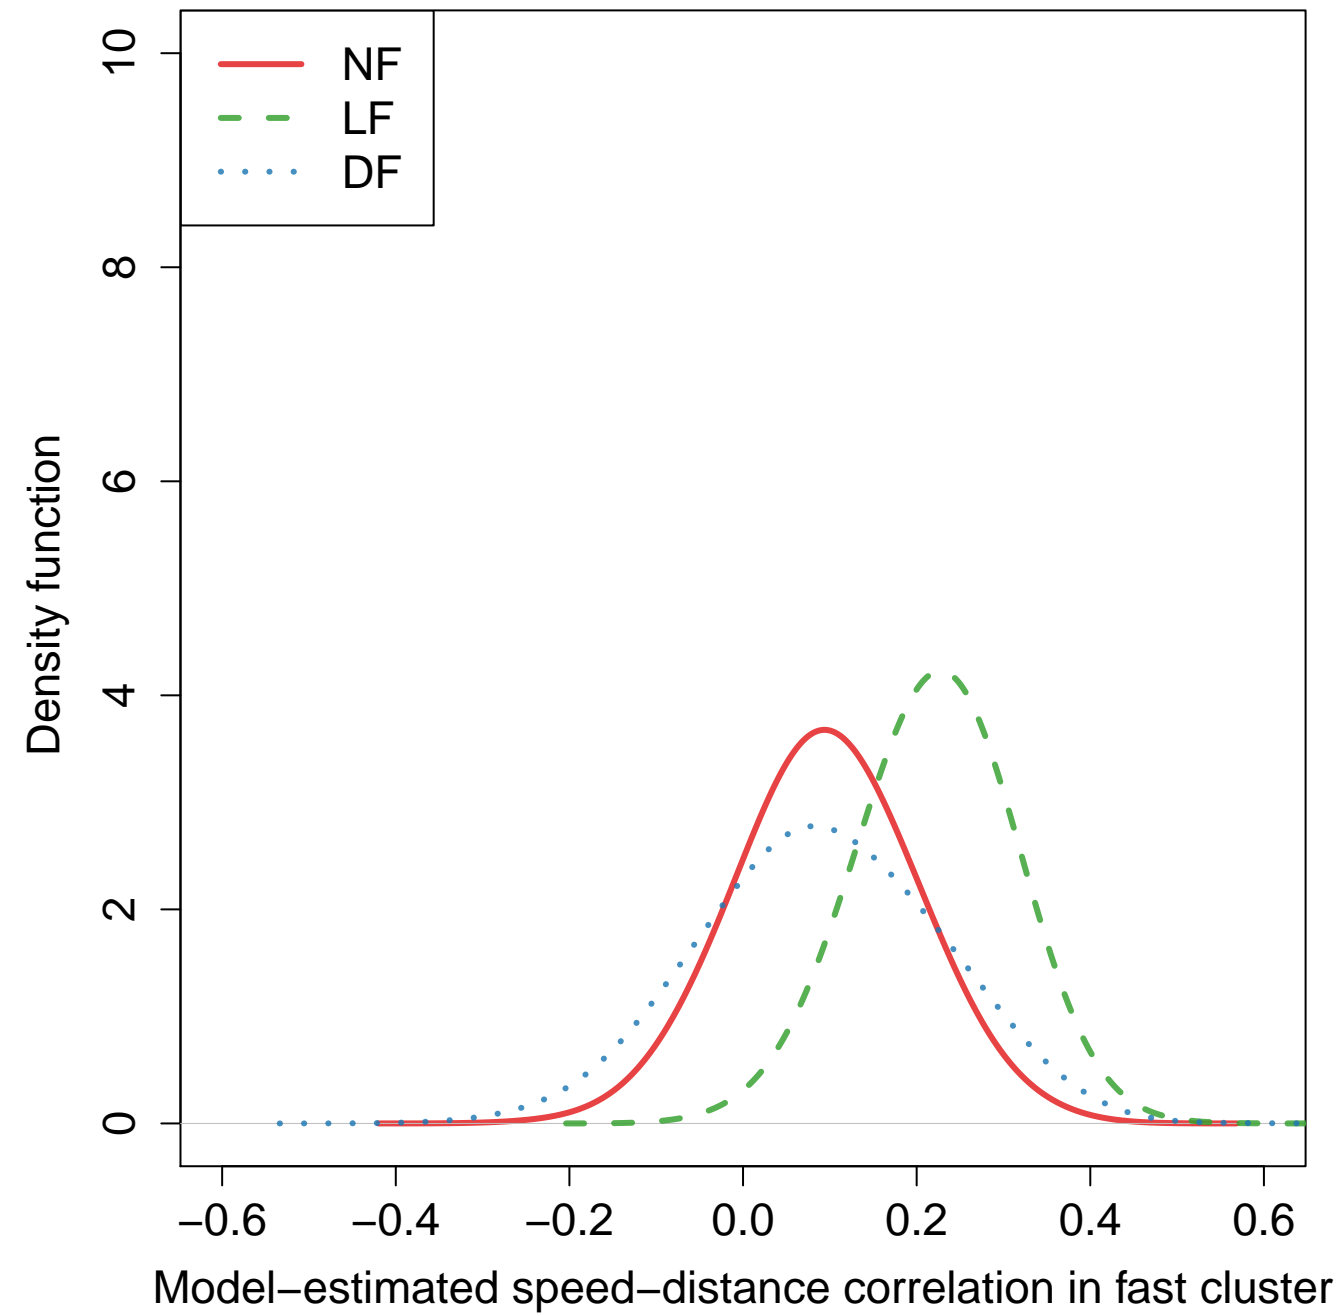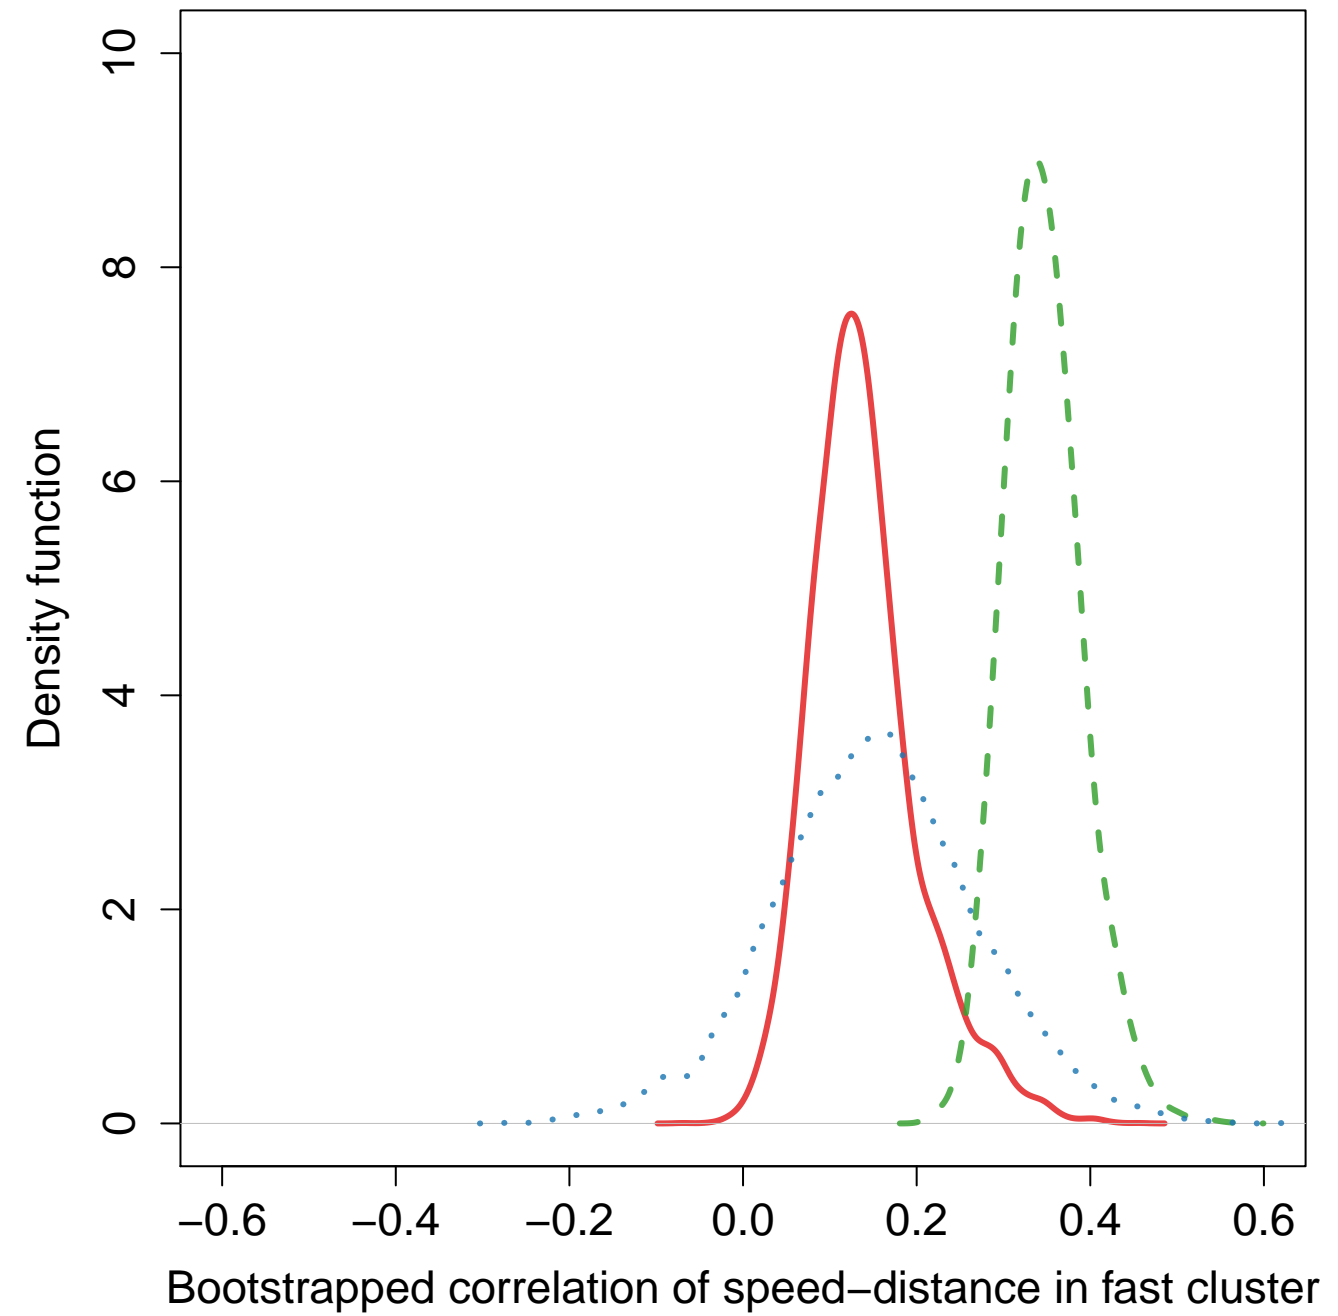

Supplement: supp [file elife-55119-supp-v1.zip]

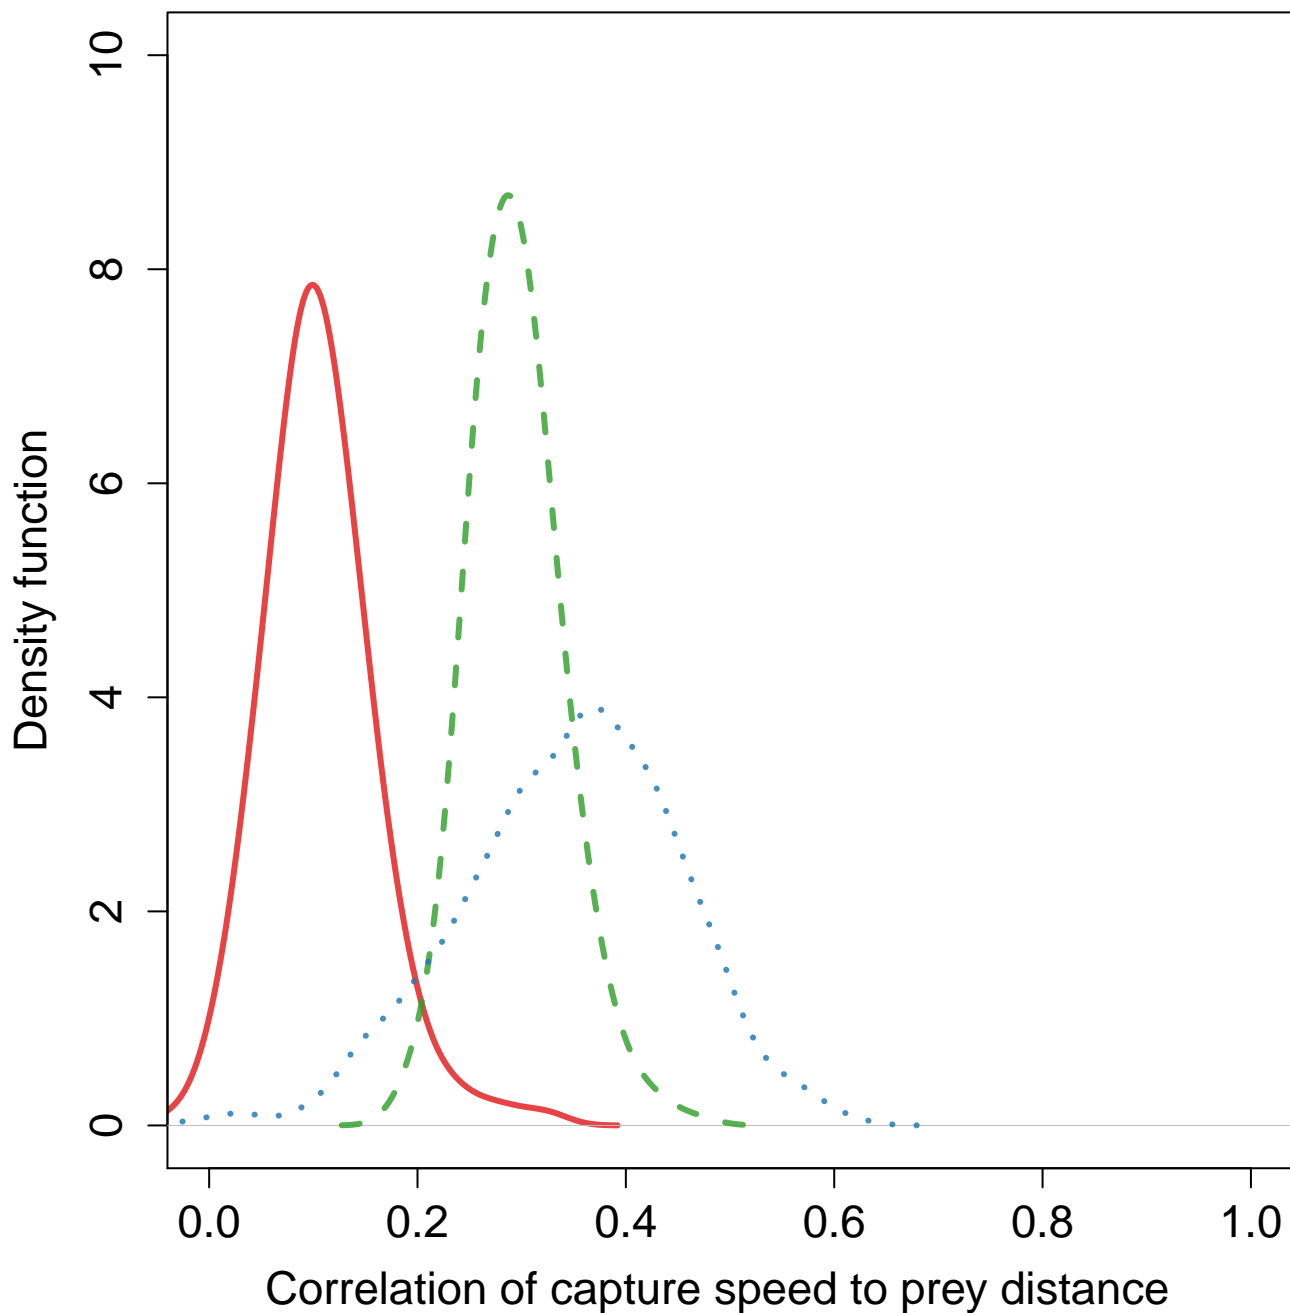

Supplement: supp [file elife-55119-supp-v1.zip]

Density function

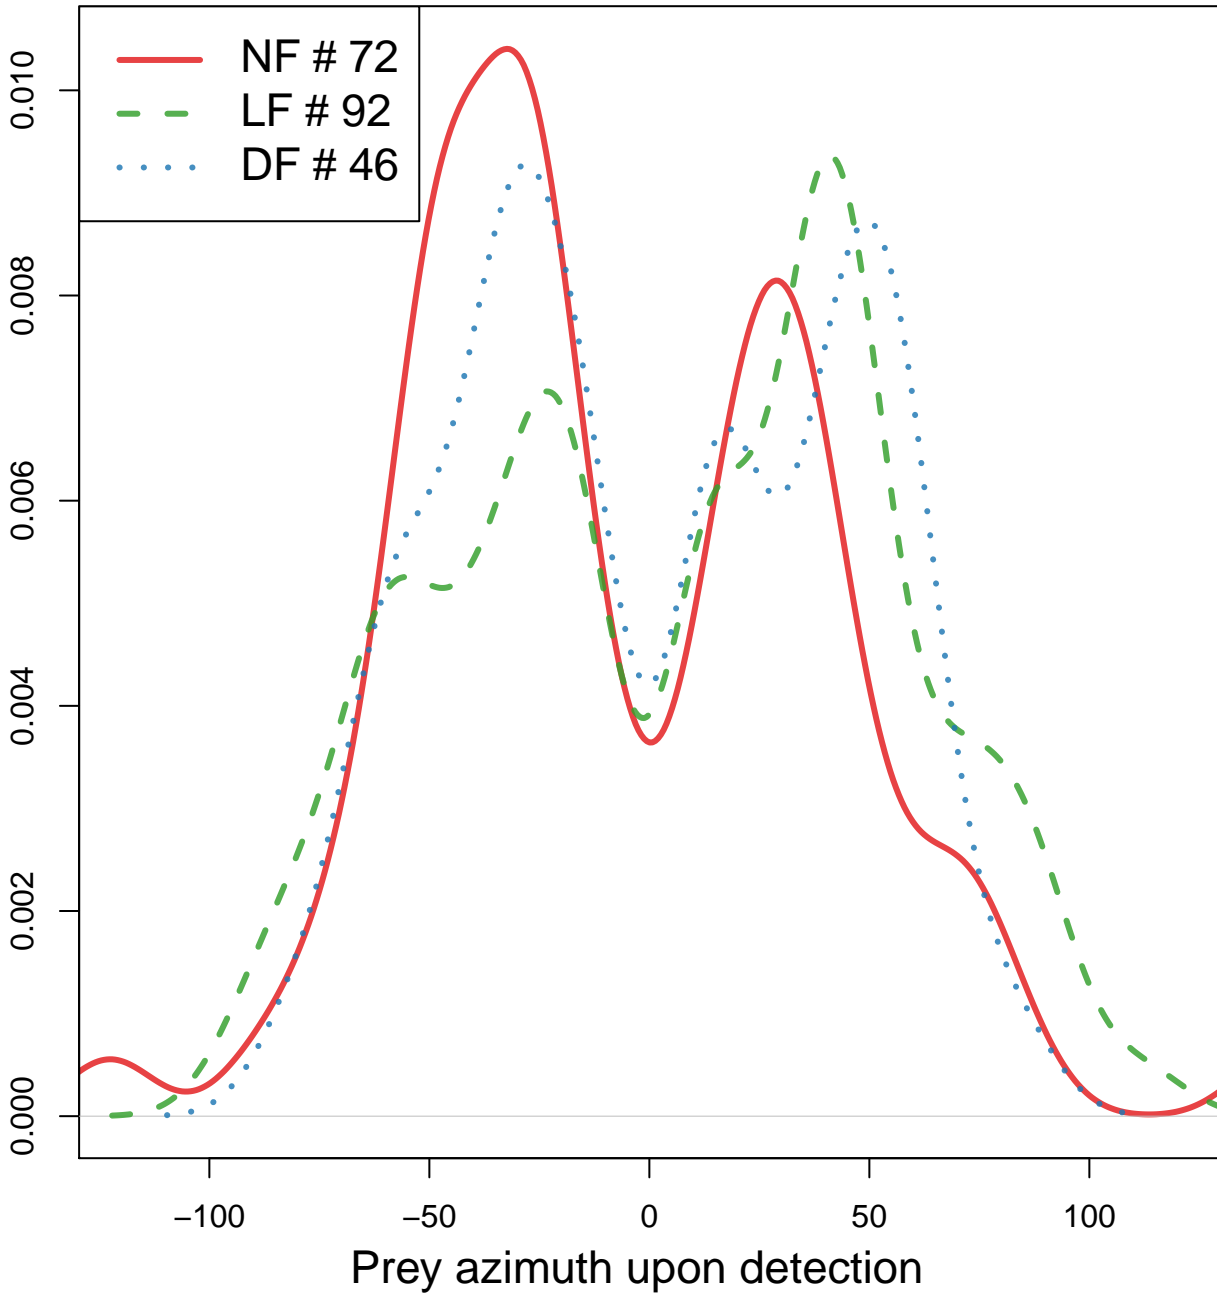

Supplement: supp [file elife-55119-supp-v1.zip]

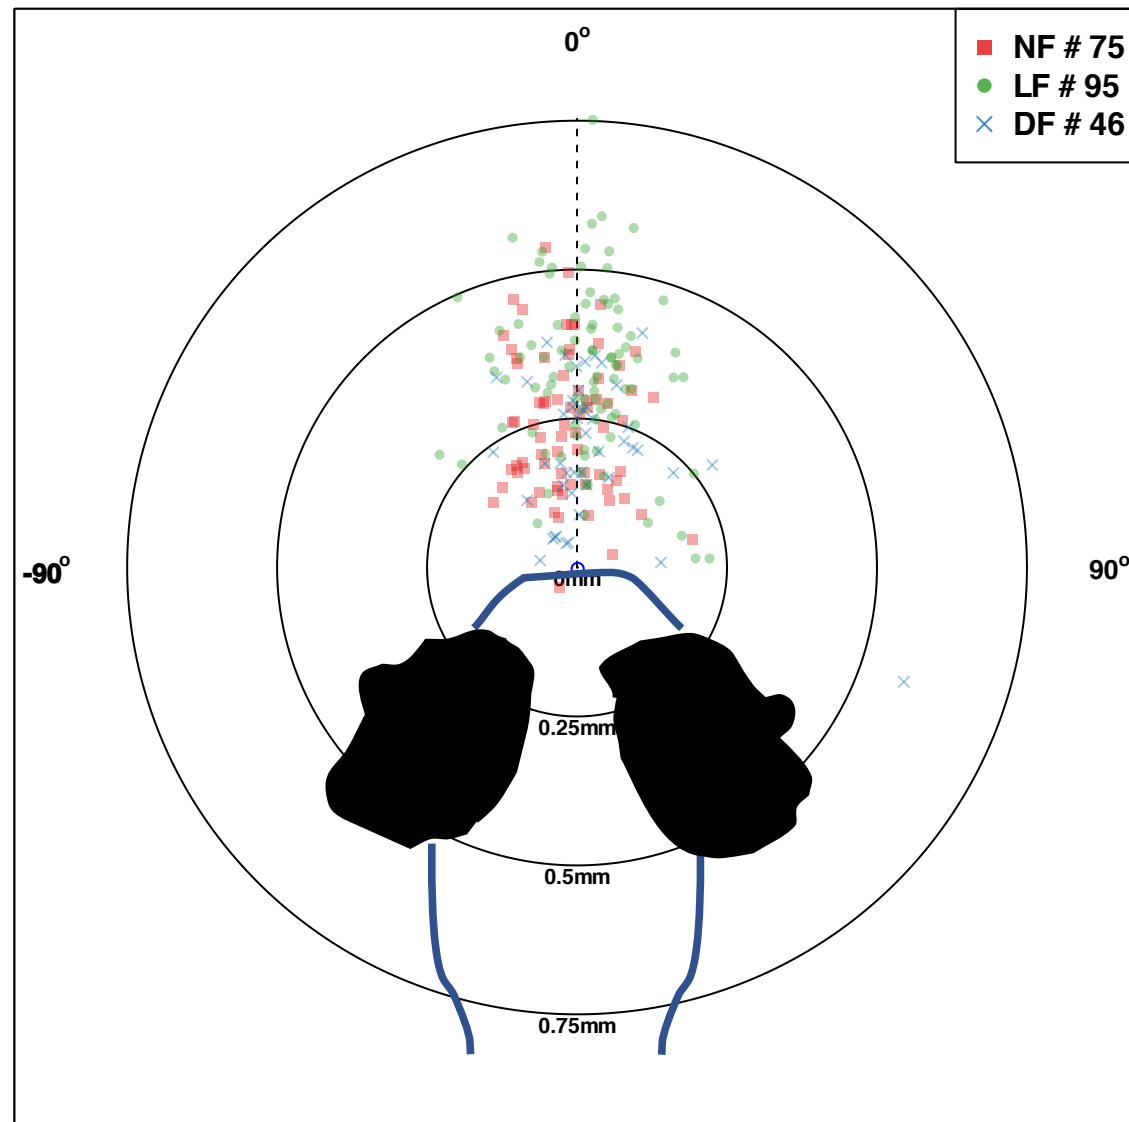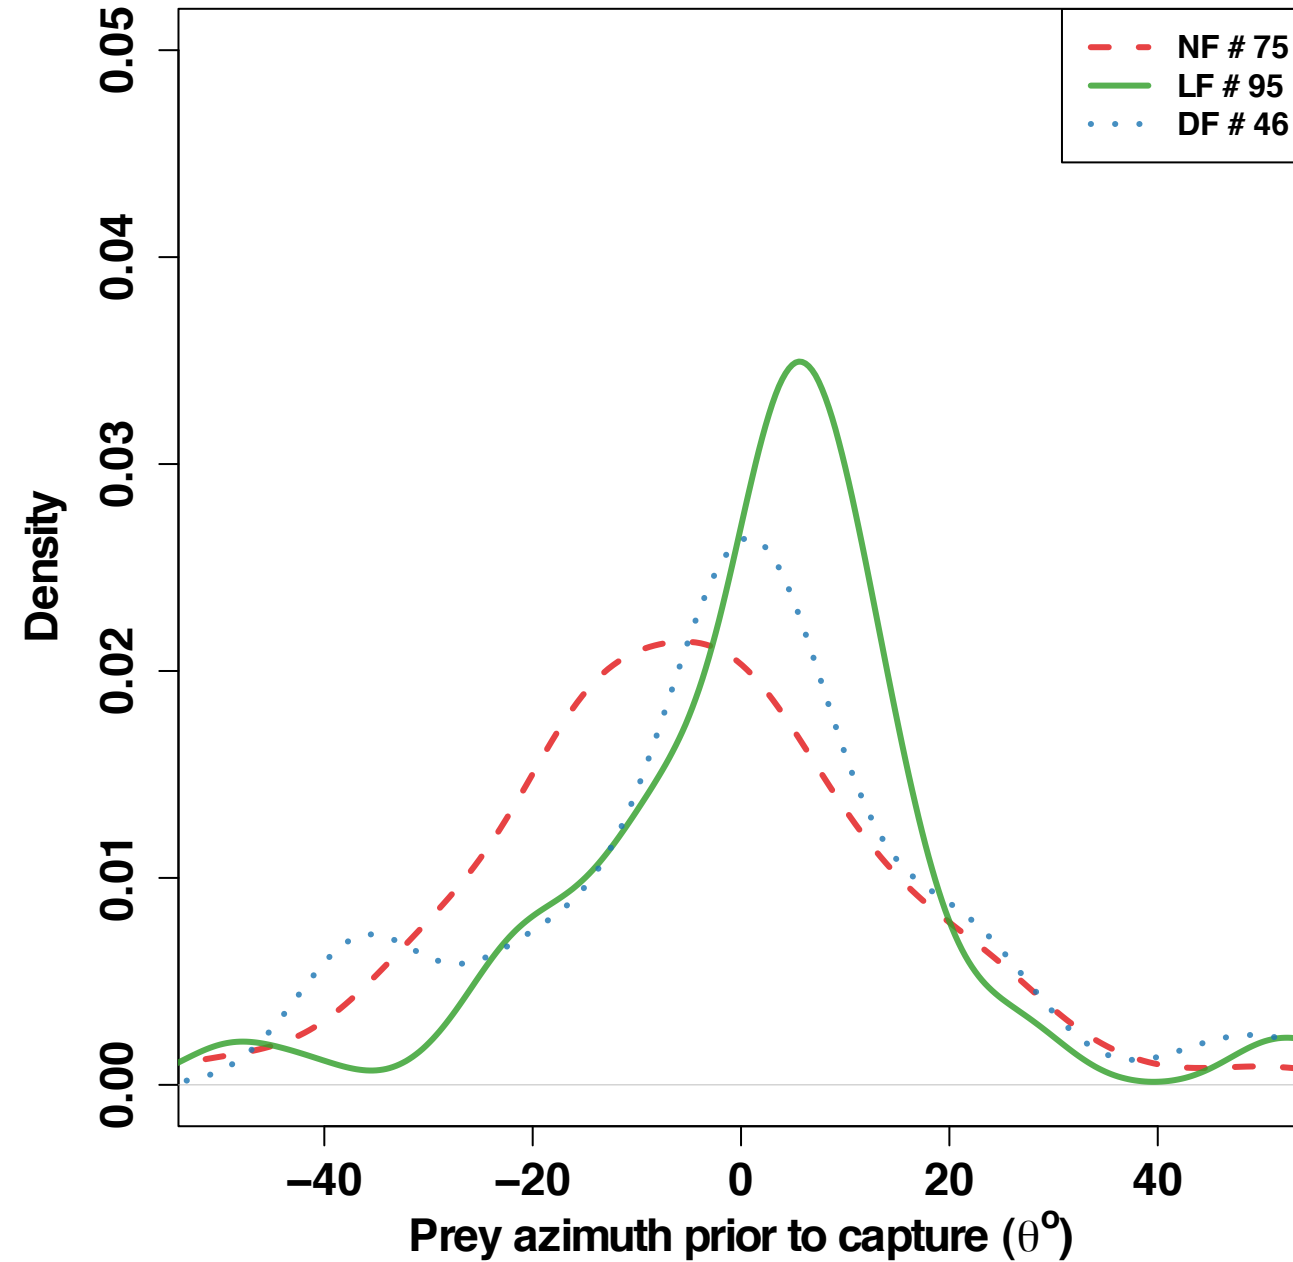

Supplement: supp [file elife-55119-supp-v1.zip]

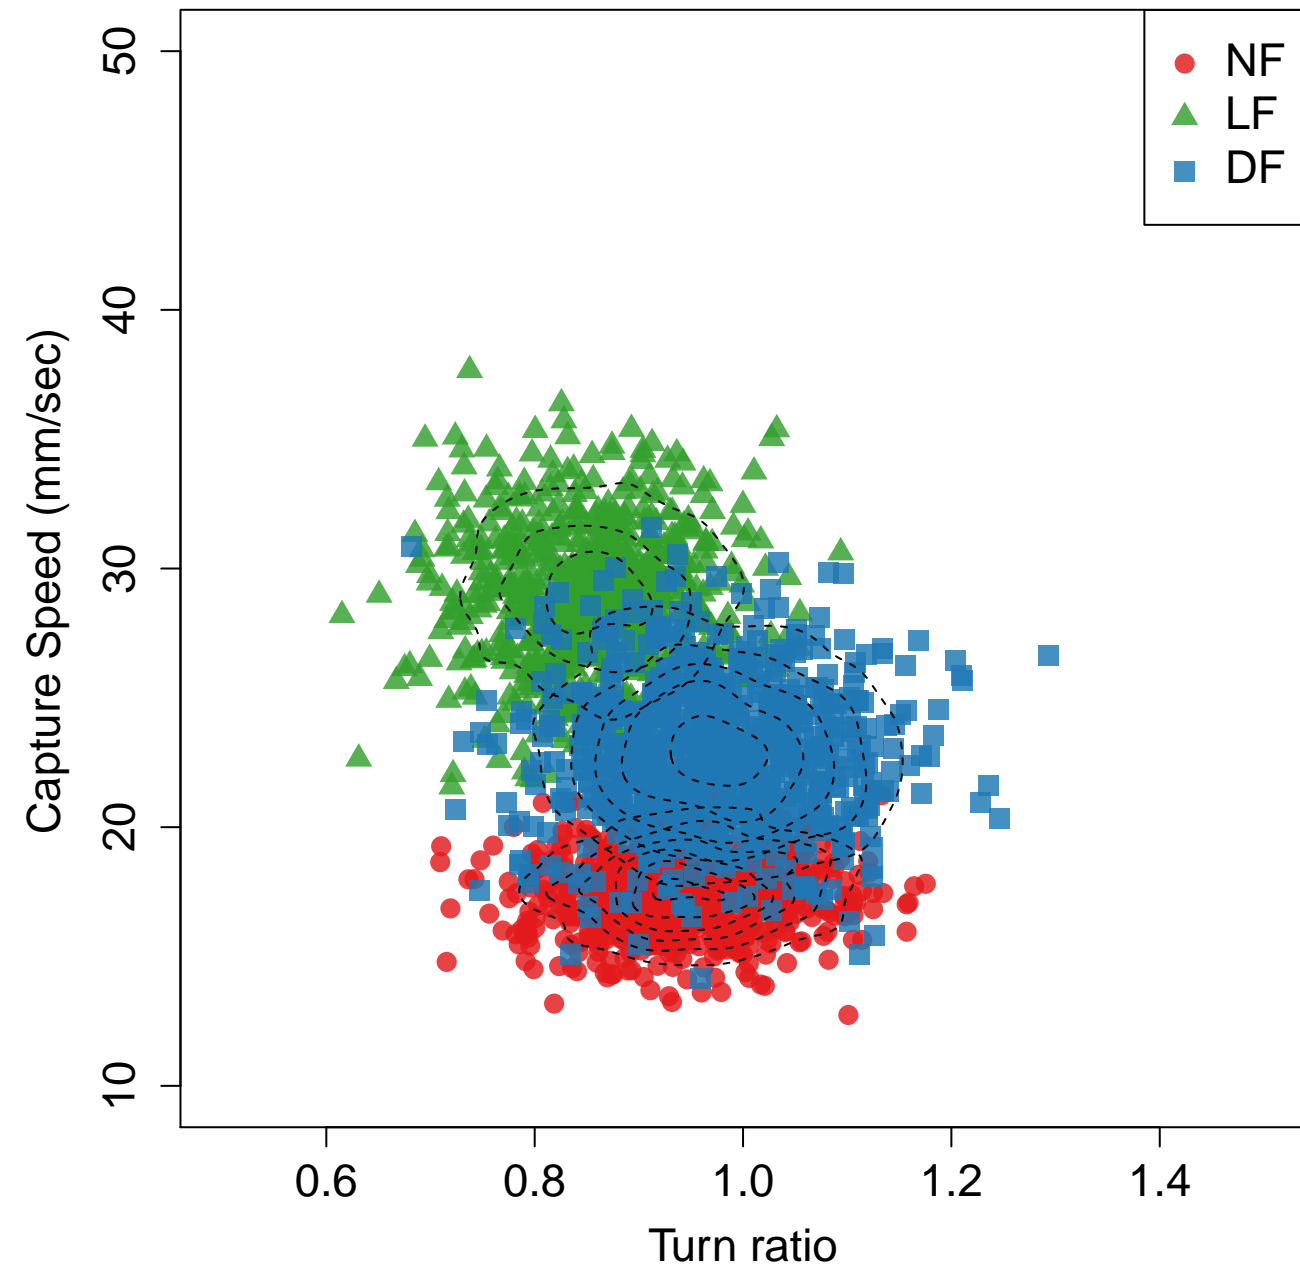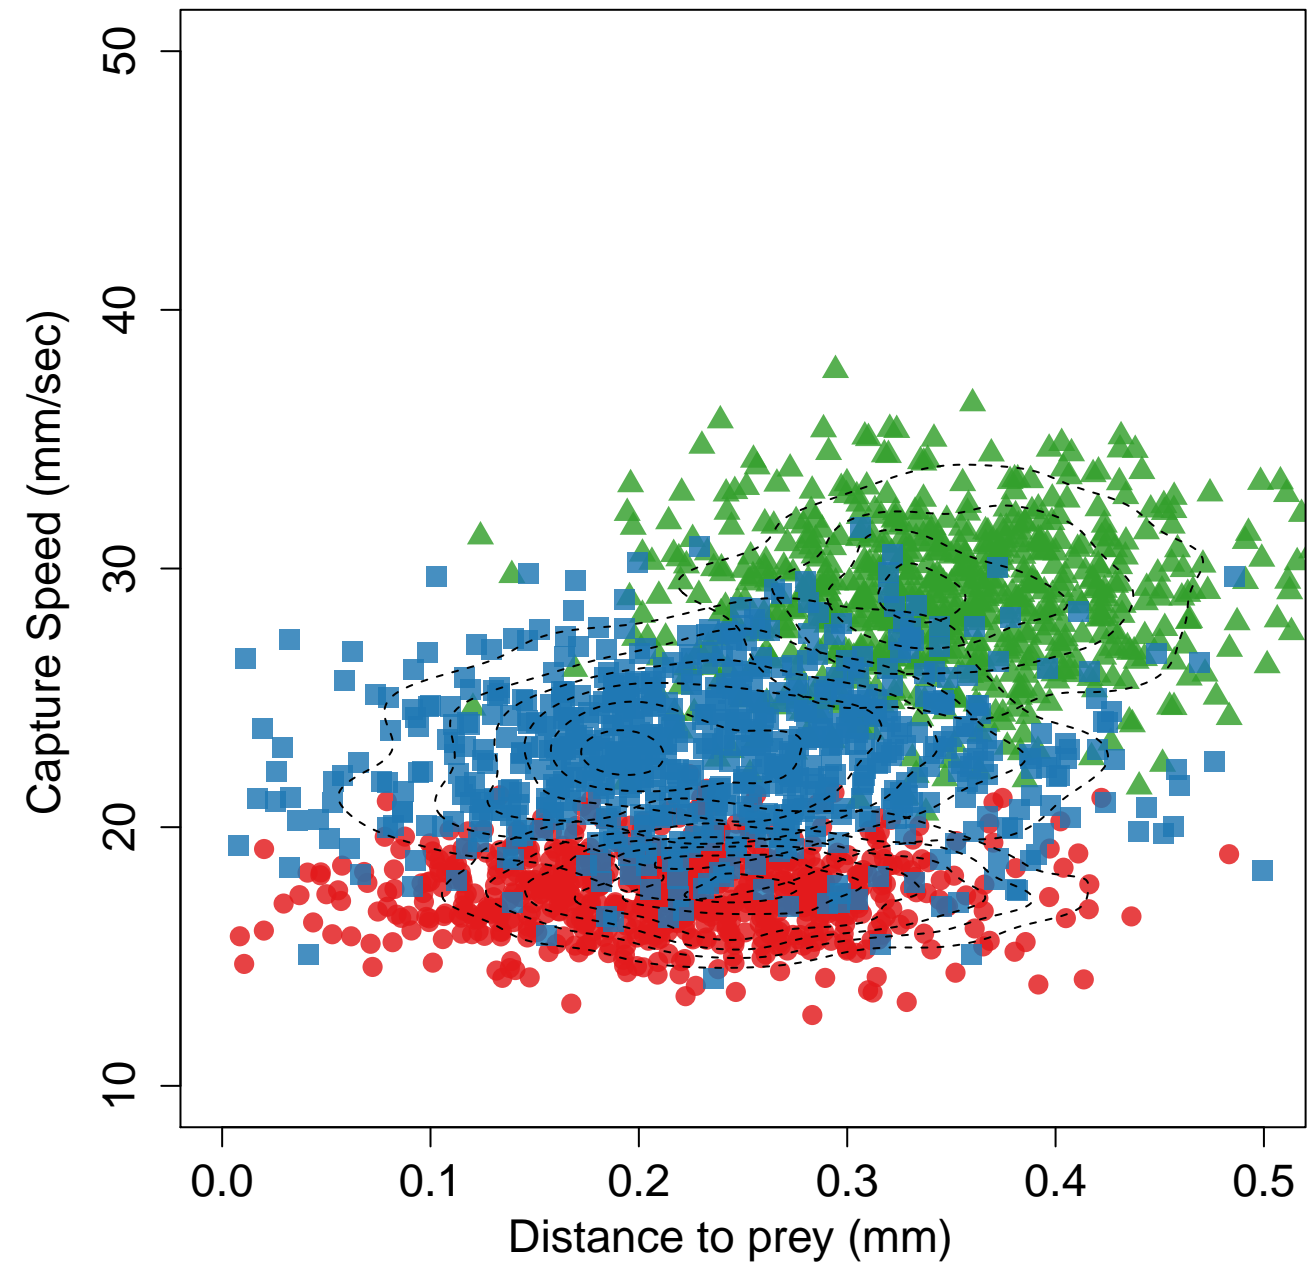

Supplement: supp [file elife-55119-supp-v1.zip]
